# Supplementary material
Source: HighWire-hosted journal article supplement (https://bmjopen.bmj.com/content/11/1/e043952)
Supplement: inline-supplementary-material-2 [file inline-supplementary-material-2.pdf]

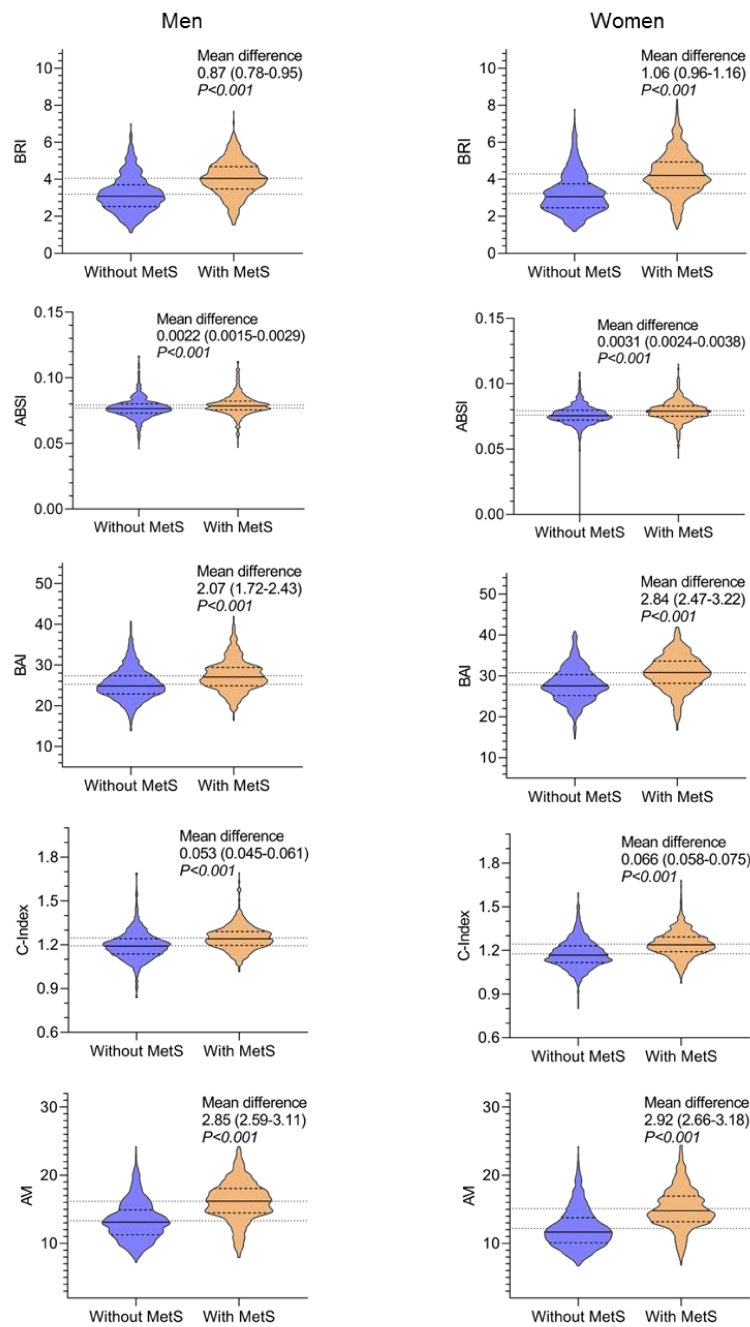

S2 Figure. Violin plots for obesity indices (BRI, ABSI, BAI, C-Index, and AVI). The dotted line was on the mean.
