# Supplementary material
Source: HighWire-hosted journal article supplement (https://bmjopen.bmj.com/content/11/1/e043952)
Supplement: inline-supplementary-material-3 [file inline-supplementary-material-3.pdf]

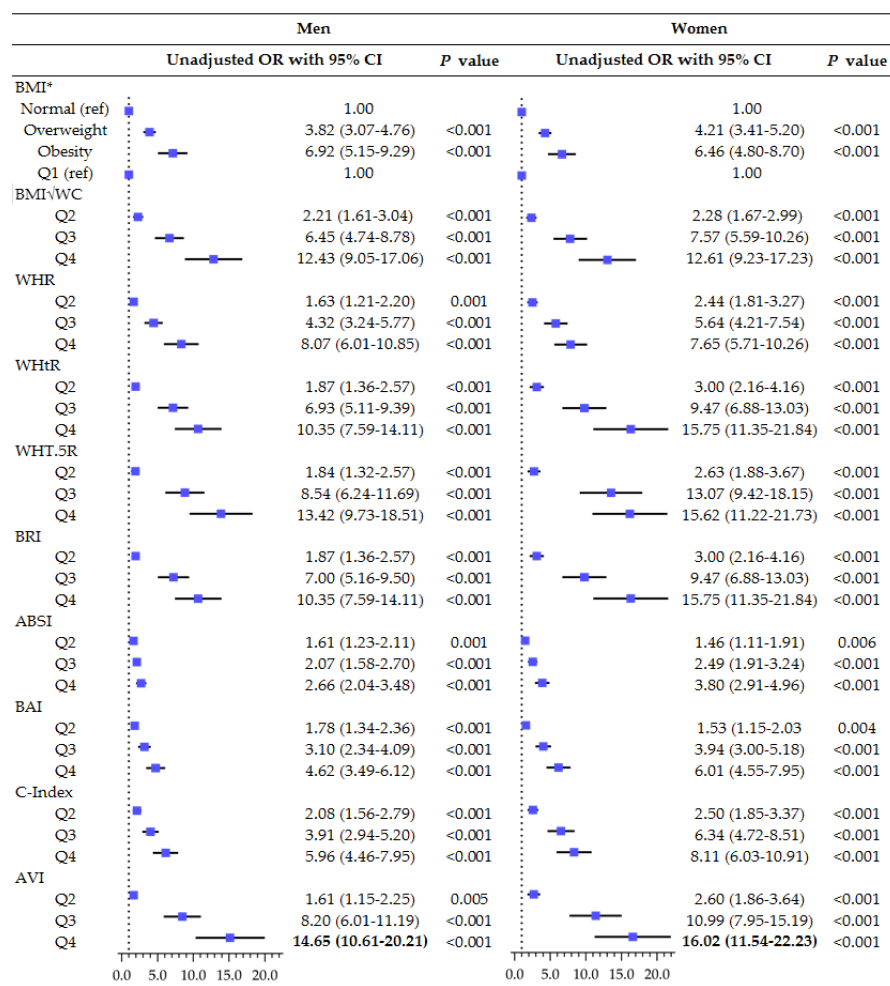

**S3 Figure. Unadjusted odds ratios for MetS in quartiles of anthropometric indices in men and women.** Odds ratio (ORs) adjusted for age, alcohol consumption, sedentary time and physical activity (extra added smoking status for women analysis). \*Normal:  $18.5 \leq \text{BMI} < 24 \text{ kg/m}^2$ ; overweight:  $24 \leq \text{BMI} < 27.9 \text{ kg/m}^2$ ; obesity:  $\text{BMI} \geq 28 \text{ kg/m}^2$ . Those with a  $\text{BMI} < 18.5 \text{ kg/m}^2$  were excluded from these analyses ( $n=64$ ), and using normal weight group as a reference group. For other anthropometric indices, the first quartile (Q1) was used as a reference group. Q2: second quartile; Q3: third quartile; Q4: fourth quartile.
