# Supplementary material
Source: HighWire-hosted journal article supplement (https://bmjopen.bmj.com/content/11/1/e043952)
Supplement: inline-supplementary-material-4 [file inline-supplementary-material-4.pdf]

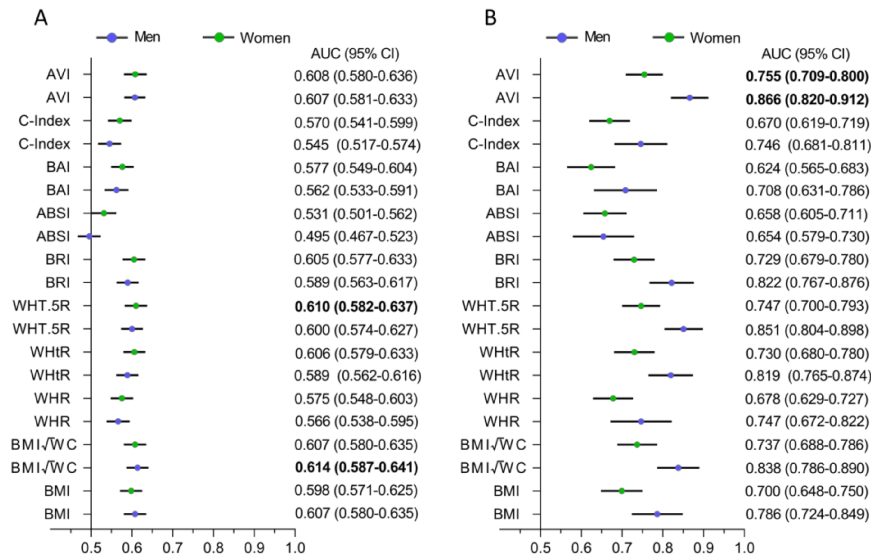

**S4 Figure. A. Sex-specific adjusted area under the ROC analysis for anthropometric indices to identify redefined MetS. B. Sex-specific adjusted area under the ROC analysis for anthropometric indices to identify MetS in participants without chronic diseases and obesity ( $BMI \geq 28 \text{ kg/m}^2$ ).** The model was adjusted for age, alcohol consumption, sedentary time and physical activity (extra added smoking status for women analysis).
