# Supplementary material
Source: HighWire-hosted journal article supplement (https://bmjopen.bmj.com/content/11/1/e043952)
Supplement: inline-supplementary-material-5 [file inline-supplementary-material-5.pdf]

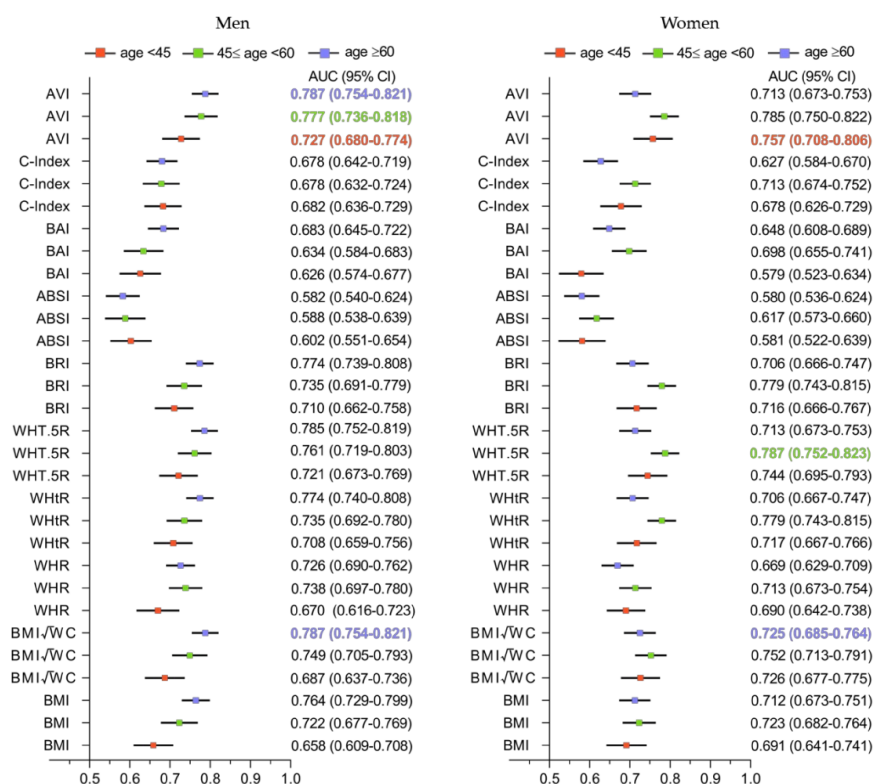

**S5 Figure. Age stratified adjusted area under the ROC analysis for anthropometric indices to identify MetS.** The model used for analysis was adjusted for age, alcohol consumption, sedentary time and physical activity (extra added smoking status for women analysis). The highest AUC value for MetS is highlighted in bold.
